# Supplementary material for: A Bayesian calibration model for combining different pre-processing methods in Affymetrix chips
Source: PubMed Central journal article supplement (PMC2639433; doi:10.1186/1471-2105-9-512), 2008-12-01
Supplement: 1471-2105-9-512-S1.pdf [file 1471-2105-9-512-S1.pdf]

# Supplementary Information

Marta Blangiardo\*<sup>1</sup> and Sylvia Richardson<sup>1</sup>

<sup>1</sup>Centre for Biostatistics, Imperial College. St. Mary's Campus, Norfolk Place London W2 1PG, UK

Email: MB: m.blangiardo@imperial.ac.uk; SR: sylvia.richardson@imperial.ac.uk;

\*Corresponding author

## 1 Posterior Predictive Check

The Posterior Predictive Check compares the observed sample variance, calculated on the expression values, and the variance of the predicted expression values of each gene under the model using an empirical p-value.

The strategy for calculating the posterior predictive check can be described as follows:

1. A new value for the gene specific component of the variance for each condition ( $\sigma_{gk}^{2(pred)}$ ) is predicted from its prior distribution  $Ga^{-1}(a_k, b_k)$
2. new data  $y_{gjkkr}^{pred}$  are generated under the chosen model, current values of the parameters  $\alpha_{gj}$ ,  $\delta_g$ ,  $\lambda_j$ ,  $\phi_j$  and the predicted variance:

$$y_{gjkkr}^{pred} \sim N(\alpha_{gj} + (-1)^k \frac{1}{2} \times \delta_g \times \phi_j, \sigma_{gjk}^{2(pred)}) \quad k = 1, 2.$$

where the variability has the same structure presented in (2),

$$\sigma_{gjk}^{2(pred)} = \exp(\lambda_{1jk} + \lambda_{2jk} \times \bar{y}_g + \lambda_{3jk} \times \bar{y}_g^2) \times \sigma_{gk}^{2(pred)}.$$

3. For each gene and pre-processing method the predicted sample variance ( $S_{gjk}^{2(pred)} = \frac{1}{2R-1} \sum_{r=1}^{2R} (y_{gjkkr}^{(pred)} - \bar{y}_{gjk}^{(pred)})^2$ ) is compared to the observed sample variance ( $S_{gjk}^{2(obs)} = \frac{1}{2R-1} \sum_{r=1}^{2R} (y_{gjkkr} - \bar{y}_{gjk})^2$ ) through the statistic ( $S_{gjk}^{2(pred)} - S_{gjk}^{2(obs)}$ ) and a p-value is generated.

Under the null hypothesis of the model being true, the distribution of the p-values should be approximatively uniform, while a poor model fit is indicated by the presence of a notable pattern in the plot, suggesting a systematic difference between the observed values and the predicted ones.

## 2 Tables and Figures

|                 | Exp 2 vs 4     |                | Exp 3 vs 6     |                | Exp 4 vs 8     |                 |
|-----------------|----------------|----------------|----------------|----------------|----------------|-----------------|
|                 | $E(\lambda y)$ | CI95%          | $E(\lambda y)$ | CI95%          | $E(\lambda y)$ | CI95%           |
| $\lambda_{111}$ | -7.005         | -7.069, -6.965 | -6.718         | -6.779, -6.674 | -7.451         | -7.490, -7.417  |
| $\lambda_{121}$ | 4.658          | 4.599, 4.712   | 4.478          | 4.429, 4.521   | 5.642          | 5.597, 5.696    |
| $\lambda_{131}$ | 2.347          | 2.299, 2.378   | 2.239          | 2.182, 2.294   | 1.809          | 1.766, 1.848    |
| $\lambda_{211}$ | 1.578          | 1.561, 1.583   | 1.395          | 1.381, 1.409   | 1.558          | 1.551, 1.565    |
| $\lambda_{221}$ | -1.274         | -1.281, -1.259 | -1.214         | -1.219, -1.207 | -1.540         | -1.555, -1.528  |
| $\lambda_{231}$ | -0.303         | -0.309, -0.296 | -0.181         | -0.197, -0.163 | -0.018         | -0.029, -0.008  |
| $\lambda_{311}$ | -0.097         | -0.098, -0.096 | -0.083         | -0.084, -0.081 | -0.090         | -0.091, -0.089  |
| $\lambda_{321}$ | 0.082          | 0.081, 0.082   | 0.080          | 0.079, 0.081   | 0.103          | 0.102, 0.104    |
| $\lambda_{331}$ | 0.016          | 0.015, 0.016   | 0.002          | 0.001, 0.004   | -0.013         | -0.014, -0.012  |
| $\lambda_{112}$ | -5.746         | -5.780, -5.706 | -6.580         | -6.626, -6.536 | -6.803         | -6.886, -6.721  |
| $\lambda_{122}$ | 3.726          | 3.682, 3.768   | 4.535          | 4.489, 4.609   | 5.134          | 5.087, 5.183    |
| $\lambda_{132}$ | 2.020          | 1.968, 2.064   | 2.045          | 1.993, 2.091   | 1.669          | 1.623, 1.715    |
| $\lambda_{212}$ | 1.058          | 1.050, 1.063   | 1.466          | 1.453, 1.483   | 1.422          | 1.408, 1.439    |
| $\lambda_{222}$ | -0.942         | -0.949, -0.932 | -1.249         | -1.275, -1.230 | -1.409         | -1.415, -1.402  |
| $\lambda_{232}$ | -0.116         | -0.128, -0.108 | -0.216         | -0.225, -0.208 | -0.013         | -0.024, -0.002  |
| $\lambda_{312}$ | -0.055         | -0.056, -0.055 | -0.088         | -0.089, -0.086 | -0.084         | -0.084, -0.082  |
| $\lambda_{322}$ | 0.058          | 0.057, 0.059   | 0.079          | 0.077, 0.081   | 0.091          | 0.090, 0.091    |
| $\lambda_{332}$ | -0.003         | -0.004, -0.002 | 0.009          | 0.008, 0.009   | -0.007         | -0.008, -0.006  |
|                 | Exp 5 vs 10    |                | Exp 6 vs 12    |                | Exp 7 vs 14    |                 |
|                 | $E(\lambda y)$ | CI95%          | $E(\lambda y)$ | CI95%          | $E(\lambda y)$ | CI95%           |
| $\lambda_{111}$ | -7.048         | -7.092, -6.987 | -6.599         | -6.643, -6.558 | -6.904         | -6.960, -6.831  |
| $\lambda_{121}$ | 4.109          | 3.994, 4.199   | 3.913          | 3.841, 4.006   | 4.387          | 4.330, 4.437    |
| $\lambda_{131}$ | 2.939          | 2.879, 3.012   | 2.686          | 2.637, 2.742   | 2.516          | 2.484, 2.540    |
| $\lambda_{211}$ | 1.585          | 1.565, 1.603   | 1.332          | 1.322, 1.351   | 1.490          | 1.476, 1.506    |
| $\lambda_{221}$ | -1.185         | -1.222, -1.150 | -1.058         | -1.077, -1.036 | -1.184         | -1.197, -1.171  |
| $\lambda_{231}$ | -0.400         | -0.417, -0.381 | -0.275         | -0.287, -0.267 | -0.306         | -0.314, -0.300  |
| $\lambda_{311}$ | -0.100         | -0.103, -0.098 | -0.076         | -0.078, -0.075 | -0.089         | -0.090, -0.087  |
| $\lambda_{321}$ | 0.081          | 0.078, 0.085   | 0.068          | 0.067, 0.070   | 0.076          | 0.075, 0.077    |
| $\lambda_{331}$ | 0.019          | 0.017, 0.021   | 0.007          | 0.006, 0.009   | 0.013          | 0.012, 0.014    |
| $\lambda_{112}$ | -7.832         | -7.876, -7.792 | -6.248         | -6.291, -6.189 | -6.994         | -7.047, -6.940  |
| $\lambda_{122}$ | 4.581          | 4.539, 4.618   | 3.939          | 3.89, 3.983    | 4.491          | 4.436, 4.545    |
| $\lambda_{132}$ | 3.252          | 3.207, 3.279   | 2.309          | 2.269, 2.344   | 2.504          | 2.463, 2.547    |
| $\lambda_{212}$ | 1.740          | 1.730, 1.747   | 1.368          | 1.359, 1.377   | 1.553          | 1.540, 1.570    |
| $\lambda_{222}$ | -1.278         | -1.287, -1.268 | -1.077         | -1.094, -1.068 | -1.224         | -1.236, -1.209  |
| $\lambda_{232}$ | -0.462         | -0.472, -0.450 | -0.290         | -0.297, -0.281 | -0.329         | -0.340s, -0.318 |
| $\lambda_{312}$ | -0.110         | -0.110, -0.109 | -0.080         | -0.081, -0.079 | -0.094         | -0.096, -0.093  |
| $\lambda_{322}$ | 0.087          | 0.086, 0.088   | 0.067          | 0.065, 0.069   | 0.078          | 0.077, 0.079    |
| $\lambda_{332}$ | 0.023          | 0.022, 0.024   | 0.014          | 0.012, 0.015   | 0.016          | 0.014, 0.018    |

Table 1: Latin Square data set: Posterior Mean and 95% credibility intervals for  $\lambda_1$ ,  $\lambda_2$  and  $\lambda_3$  in the variability model presented in (2) for additional comparisons to check the consistence of the results.  $j = 1, 2, 3$  indicates the pre-processing method,  $k = 1, 2$  indicates the condition. The coefficients satisfy the “sum to 0” constraint.

|       | Exp 2 vs 4  |              | Exp 3 vs 6  |              | Exp 4 vs 8  |              |
|-------|-------------|--------------|-------------|--------------|-------------|--------------|
|       | $E(\phi y)$ | CI95%        | $E(\phi y)$ | CI95%        | $E(\phi y)$ | CI95%        |
| MAS5  | 1.452       | 1.438, 1.464 | 1.530       | 1.516, 1.554 | 1.216       | 1.207, 1.223 |
| RMA   | 1.049       | 1.041, 1.059 | 1.063       | 1.044, 1.076 | 1.236       | 1.228, 1.245 |
| dChip | 0.656       | 0.651, 0.660 | 0.615       | 0.606, 0.622 | 0.666       | 0.662, 0.669 |
|       | Exp 5 vs 10 |              | Exp 6 vs 12 |              | Exp 7 vs 14 |              |
|       | $E(\phi y)$ | CI95%        | $E(\phi y)$ | CI95%        | $E(\phi y)$ | CI95%        |
| MAS5  | 1.283       | 1.276, 1.292 | 1.460       | 1.451, 1.469 | 1.297       | 1.297, 1.326 |
| RMA   | 1.185       | 1.178, 1.192 | 1.098       | 1.091, 1.103 | 1.140       | 1.132, 1.148 |
| dChip | 0.658       | 0.656, 0.660 | 0.624       | 0.620, 0.627 | 0.679       | 0.670, 0.687 |

Table 2: Latin Square data set: Posterior Mean and 95% credibility intervals for the relative bias  $\exp(\phi_j)$  for additional comparisons to check the consistence of the results.  $j = 1, 2, 3$  indicates the pre-processing method. The coefficients satisfy the constraint that  $\prod \phi_j = 1$ .

|          | Exp 2 vs 4            |       |    |    | Exp 3 vs 6            |       |    |    |
|----------|-----------------------|-------|----|----|-----------------------|-------|----|----|
|          | First 64 ranked genes |       |    |    | First 64 ranked genes |       |    |    |
|          | FP                    | TN    | TP | FN | FP                    | TN    | TP | FN |
| Combined | 13                    | 11331 | 51 | 13 | 12                    | 11334 | 52 | 12 |
| MAS5     | 18                    | 11326 | 46 | 18 | 18                    | 11328 | 46 | 18 |
| RMA      | 16                    | 11328 | 48 | 16 | 15                    | 11331 | 49 | 15 |
| dChip    | 21                    | 11323 | 43 | 21 | 34                    | 11312 | 30 | 34 |
|          | Exp 4 vs 8            |       |    |    | Exp 5 vs 10           |       |    |    |
|          | First 64 ranked genes |       |    |    | First 64 ranked genes |       |    |    |
|          | FP                    | TN    | TP | FN | FP                    | TN    | TP | FN |
| Combined | 20                    | 11233 | 44 | 20 | 18                    | 11448 | 46 | 18 |
| MAS5     | 29                    | 11224 | 35 | 29 | 23                    | 11443 | 41 | 23 |
| RMA      | 23                    | 11230 | 41 | 23 | 20                    | 11446 | 44 | 20 |
| dChip    | 34                    | 11219 | 30 | 34 | 28                    | 11438 | 36 | 28 |
|          | Exp 6 vs 12           |       |    |    | Exp 7 vs 14           |       |    |    |
|          | First 64 ranked genes |       |    |    | First 64 ranked genes |       |    |    |
|          | FP                    | TN    | TP | FN | FP                    | TN    | TP | FN |
| Combined | 9                     | 11305 | 55 | 9  | 13                    | 11368 | 51 | 13 |
| MAS5     | 15                    | 11299 | 49 | 15 | 26                    | 11355 | 38 | 26 |
| RMA      | 11                    | 11303 | 53 | 11 | 19                    | 11362 | 45 | 19 |
| dChip    | 19                    | 11295 | 45 | 19 | 33                    | 11348 | 31 | 33 |

Table 3: Latin Square dataset: operating characteristics of the combined method and of each pre-processing method on the first 64 probesets ranked accordingly to their tail posterior probability for additional comparisons to check the consistence of the results. Note that  $FP = FN$  since the size of the list of differentially expressed probesets is equal to the number of *true positives*. The times for running the combined model for each comparison are the following: 10h and 40', 10h and 41', 10h and 28', 10h and 53', 10h and 37', 10h and 46'.

| Model specification                                                 |                                                                                        |            |
|---------------------------------------------------------------------|----------------------------------------------------------------------------------------|------------|
| Variability                                                         | Bias                                                                                   | <i>DIC</i> |
| $\lambda_{jk}$                                                      | multiplicative bias function of global expression ( $\phi_{j1} + \phi_{j2}\bar{y}_g$ ) | -452010    |
| $\lambda_{1jk} + \lambda_{2jk}\bar{y}_g + \lambda_{3jk}\bar{y}_g^2$ | multiplicative bias function of global expression ( $\phi_{j1} + \phi_{j2}\bar{y}_g$ ) | -463560    |
| $\lambda_{jk}$                                                      | multiplicative bias ( $\phi_{j1}$ )                                                    | -462127    |
| $\lambda_{1jk} + \lambda_{2jk}\bar{y}_g + \lambda_{3jk}\bar{y}_g^2$ | multiplicative bias ( $\phi_{j1}$ )                                                    | -473836    |
| $\lambda_{1jk} + \lambda_{2jk}\bar{y}_g + \lambda_{3jk}\bar{y}_g^2$ | additive bias ( $\xi_{j1}$ )                                                           | -453210    |

Table 4: Deviation Information Criteria for different models on the Latin Square dataset

| Model specification                                                 |                                     |            |
|---------------------------------------------------------------------|-------------------------------------|------------|
| Variability                                                         | Bias                                | <i>DIC</i> |
| $\lambda_{jk}$                                                      | multiplicative bias ( $\phi_{j1}$ ) | 92331      |
| $\lambda_{1jk} + \lambda_{2jk}\bar{y}_g + \lambda_{3jk}\bar{y}_g^2$ | multiplicative bias ( $\phi_{j1}$ ) | 63964      |
| $\lambda_{1jk} + \lambda_{2jk}\bar{y}_g + \lambda_{3jk}\bar{y}_g^2$ | additive bias ( $\xi_{j1}$ )        | 67795      |

Table 5: Deviation Information Criteria for different models on the High Fat Diet dataset

|                       | $E(\lambda \mid \mathbf{y})$ | <i>CI</i> 95% |
|-----------------------|------------------------------|---------------|
| $\lambda_{1,j=1,k=1}$ | -5.96                        | -6.14 , -5.25 |
| $\lambda_{1,j=2,k=1}$ | 4.30                         | 4.17 , 4.44   |
| $\lambda_{1,j=3,k=1}$ | 1.66                         | 1.50 , 1.78   |
| $\lambda_{2,j=1,k=1}$ | 1.22                         | 1.19 , 1.27   |
| $\lambda_{2,j=2,k=1}$ | -1.14                        | -1.18 , -1.10 |
| $\lambda_{2,j=3,k=1}$ | -0.08                        | -0.11 , -0.03 |
| $\lambda_{3,j=1,k=1}$ | -0.07                        | -0.07 , -0.07 |
| $\lambda_{3,j=2,k=1}$ | 0.07                         | 0.07 , 0.08   |
| $\lambda_{3,j=3,k=1}$ | -0.00                        | -0.01 , 0.01  |
| $\lambda_{1,j=1,k=2}$ | -7.07                        | -7.20 , -6.94 |
| $\lambda_{1,j=2,k=2}$ | 4.82                         | 4.66 , 4.93   |
| $\lambda_{1,j=3,k=2}$ | 2.25                         | 2.11 , 2.36   |
| $\lambda_{2,j=1,k=2}$ | 1.61                         | 1.58 , 1.65   |
| $\lambda_{2,j=2,k=2}$ | -1.36                        | -1.39 , -1.31 |
| $\lambda_{2,j=3,k=2}$ | -0.25                        | -0.28 , -0.21 |
| $\lambda_{3,j=1,k=2}$ | -0.10                        | -0.10 , -0.10 |
| $\lambda_{3,j=2,k=2}$ | 0.09                         | 0.09 , 0.09   |
| $\lambda_{3,j=3,k=2}$ | 0.01                         | 0.01 , 0.01   |

Table 6: Latin Square data set: Posterior Mean and 95% credibility intervals for  $\lambda_1$ ,  $\lambda_2$  and  $\lambda_3$  in the variability model presented in (2).  $j = 1, 2, 3$  indicates the pre-processing method,  $k = 1, 2$  indicates the condition. The coefficients satisfy the “sum to 0” constraint.

|                       | $E(\lambda   \mathbf{y})$ | $CI_{95\%}$     |
|-----------------------|---------------------------|-----------------|
| $\lambda_{1,j=1,k=1}$ | -4.791                    | -4.811 , -4.771 |
| $\lambda_{1,j=2,k=1}$ | 2.550                     | 2.522 , 2.575   |
| $\lambda_{1,j=3,k=1}$ | 2.241                     | 2.217 , 2.272   |
| $\lambda_{2,j=1,k=1}$ | 0.743                     | 0.736 , 0.749   |
| $\lambda_{2,j=2,k=1}$ | -0.590                    | -0.598 , -0.576 |
| $\lambda_{2,j=3,k=1}$ | -0.153                    | -0.161 , -0.146 |
| $\lambda_{3,j=1,k=1}$ | -0.024                    | -0.025 , -0.023 |
| $\lambda_{3,j=2,k=1}$ | 0.028                     | 0.027 , 0.029   |
| $\lambda_{3,j=3,k=1}$ | -0.004                    | -0.005 , -0.003 |
| $\lambda_{1,j=1,k=2}$ | -6.604                    | -6.638 , -6.575 |
| $\lambda_{1,j=2,k=2}$ | 3.628                     | 3.580 , 3.680   |
| $\lambda_{1,j=3,k=2}$ | 2.976                     | 2.948 , 3.001   |
| $\lambda_{2,j=1,k=2}$ | 1.454                     | 1.447 , 1.461   |
| $\lambda_{2,j=2,k=2}$ | -0.944                    | -0.957 , -0.933 |
| $\lambda_{2,j=3,k=2}$ | -0.510                    | -0.515 , -0.502 |
| $\lambda_{3,j=1,k=2}$ | -0.081                    | -0.082 , -0.081 |
| $\lambda_{3,j=2,k=2}$ | 0.053                     | 0.052 , 0.054   |
| $\lambda_{3,j=3,k=2}$ | 0.028                     | 0.028 , 0.029   |

Table 7: HFD vs NFD experiment: Posterior Mean and 95% credibility intervals for  $\lambda_1$ ,  $\lambda_2$  and  $\lambda_3$  in the variability model presented in (2).  $j = 1, 2, 3$  indicates the pre-processing method,  $k = 1, 2$  indicates the condition. The coefficients satisfy the “sum to 0” constraint.

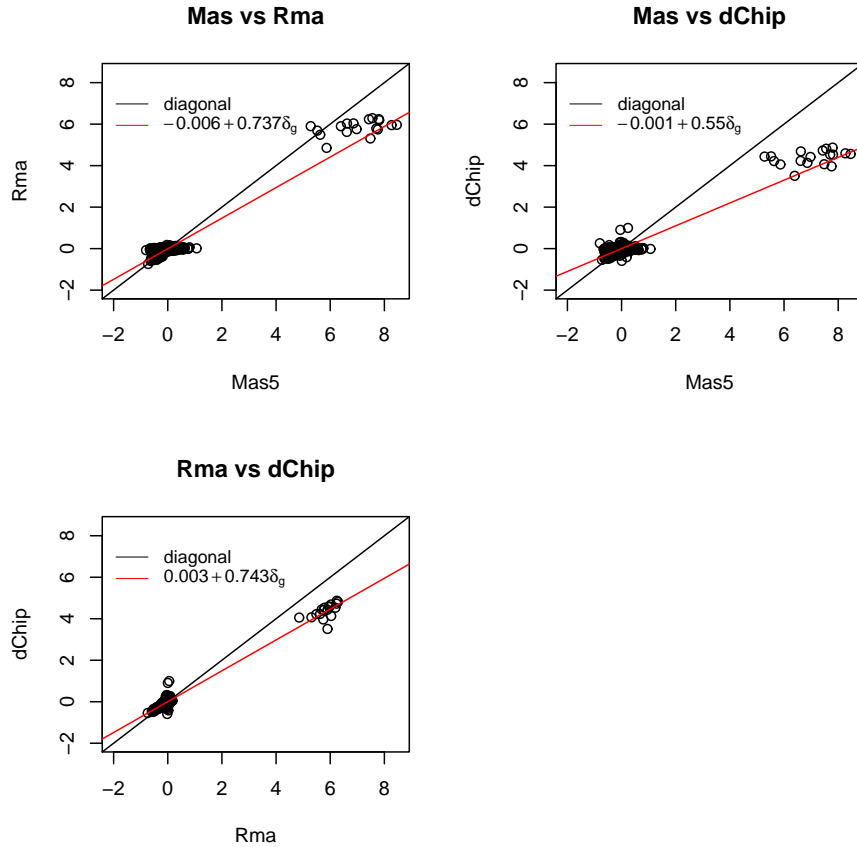

Figure 1: Latin Square dataset: the plots present the pairwise comparison of differential expression for the pre-processing methods considered. In absence of bias the data should lie on the diagonal (black line). If the additive component of the bias is the most relevant ( $\alpha_{gj} + \delta_g + \xi_j$ ), a shift should be visible in the differential expression of one pre-processing method with respect to the other. If the multiplicative component is more important ( $\alpha_{gj} + \delta_g \times \phi_j$ ) a twist should be present in the scatterplot, as one method is characterised by an inflation (or deflation) with respect to the other differential expression. Regressing the differential expression of one method to the other (red line), we see that the slope is different from 1 (representing the inflation/deflation in case of multiplicative bias), while the intercept is small and generally close to 0 (representing the shift in case of additive bias). This suggests that the bias is better represented by a multiplicative component of the differential expression.

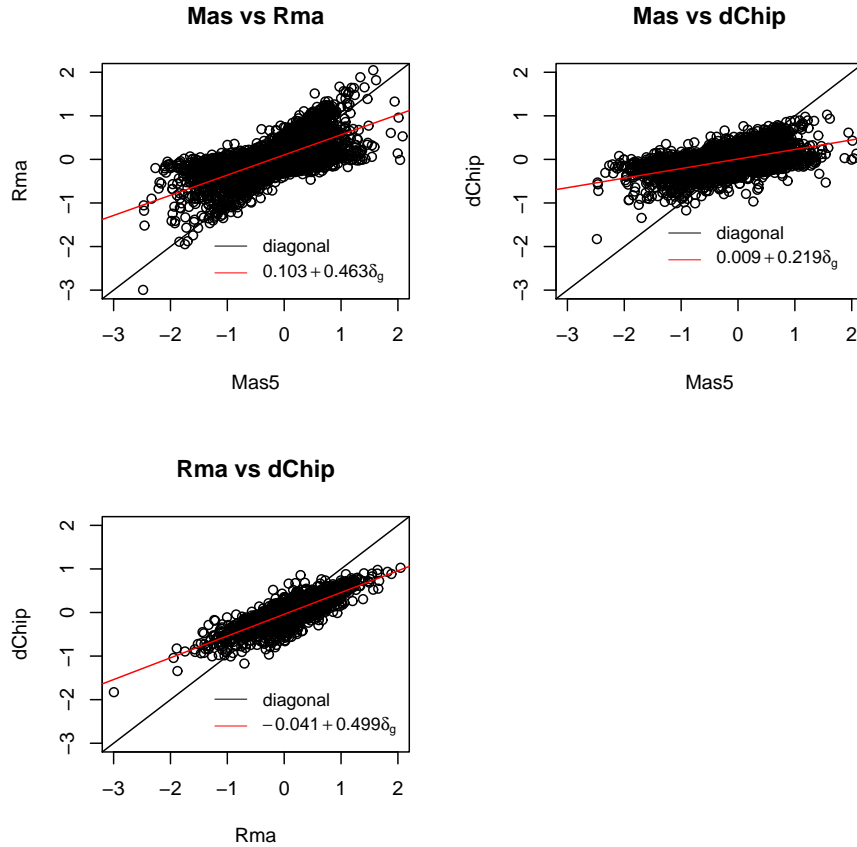

Figure 2: High Fat Diet vs Normal Fat Diet experiment: the plots present the pairwise comparison of differential expression for the pre-processing methods considered. In absence of bias the data should lie on the diagonal (black line). If the additive component of the bias is the most relevant ( $\alpha_{gj} + \delta_g + \xi_j$ ), a shift should be visible in the differential expression of one pre-processing method with respect to the other. If the multiplicative component is more important ( $\alpha_{gj} + \delta_g \times \phi_j$ ) a twist should be present in the scatterplot, as one method is characterised by an inflation (or deflation) with respect to the other differential expression. Regressing the differential expression of one method to the other (red line), we see that the slope is different from 1 (representing the inflation/deflation in case of multiplicative bias), while the intercept is small and generally close to 0 (representing the shift in case of additive bias). This suggests that the bias is better represented by a multiplicative component of the differential expression.

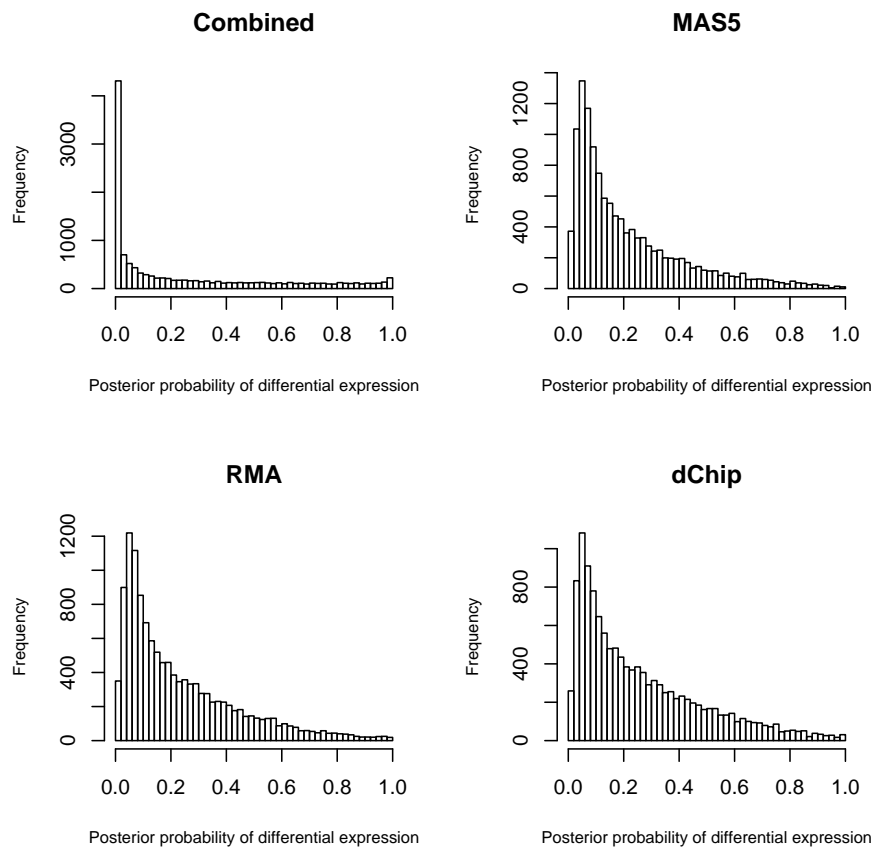

Figure 3: High Fat Diet vs Normal Fat Diet experiment: the histograms show the distribution of the tail posterior probability for the combined method and each pre-processing method separately, considering MAS5, RMA and dChip. In contrast to what happens for each single pre-processing method, the combined model shows a local peak on the right tail of the distribution, indicating evidence of differential expression.



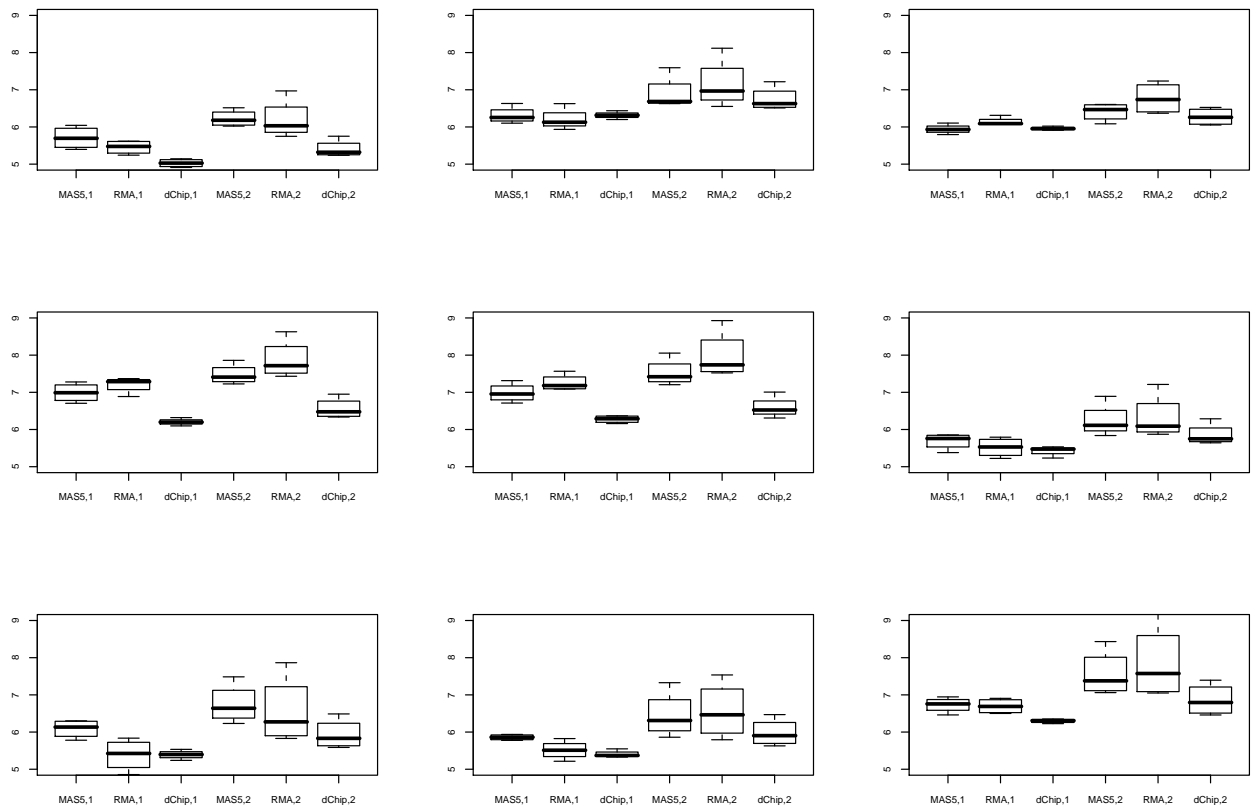

Figure 4: High Fat Diet vs Normal Fat Diet experiment: Box Plot for 9 out of the 61 probesets selected as differentially expressed only by the combined approach.

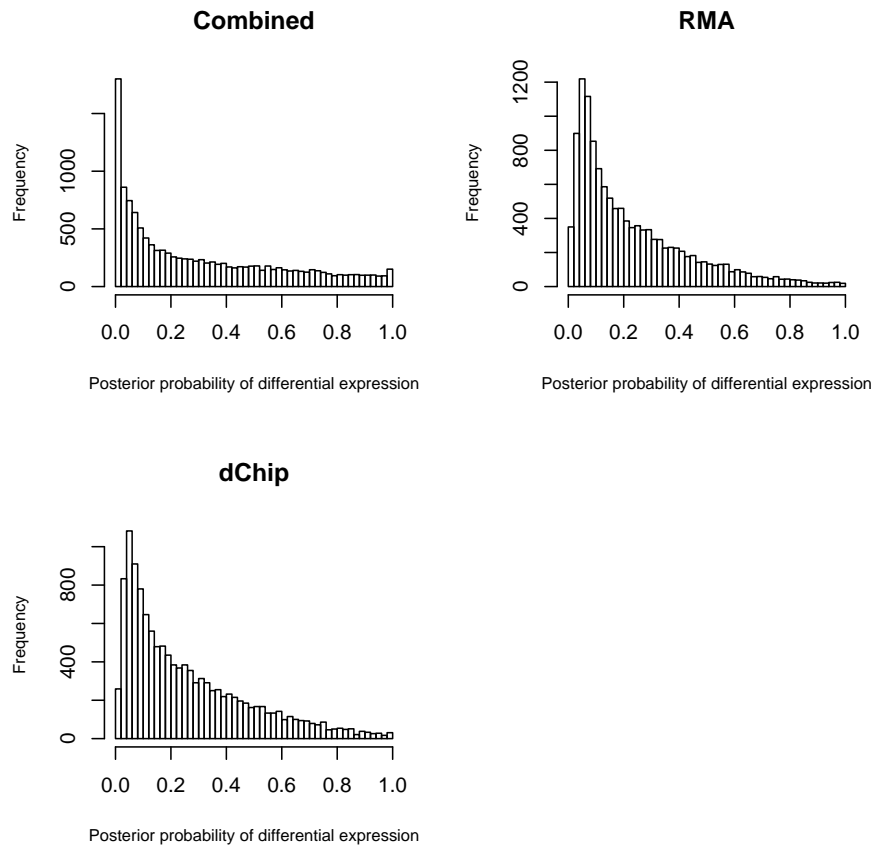

Figure 5: High Fat Diet vs Normal Fat Diet experiment: the histograms show the distribution of the tail posterior probability for the combined method and each pre-processing method separately, when we consider only RMA and dChip. In contrast to what happens for each single pre-processing method, the combined model shows a local peak on the right tail of the distribution, indicating evidence of differential expression.

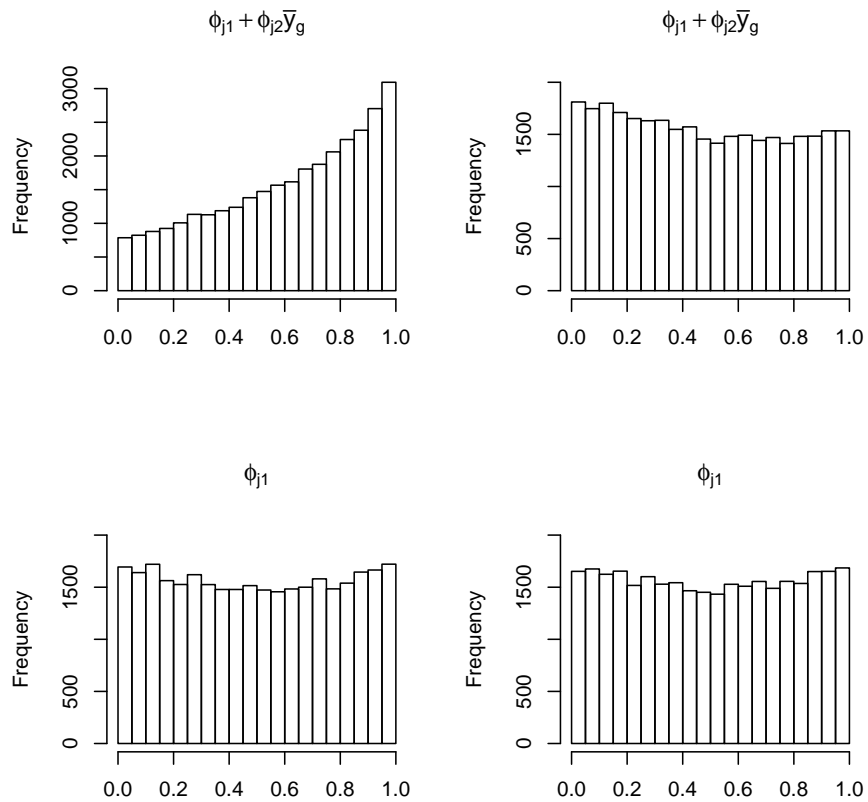

Figure 6: Posterior Predictive Check: comparing the models on the bias parameter. The upper plots are related to the model where the bias is a polynomial function of the level of expression. For the first condition is clearly visible a pattern deviating from the uniformity. The bottom plot is related to the model with only 1 bias for each pre-processing method. The p-values show a uniform behavior.

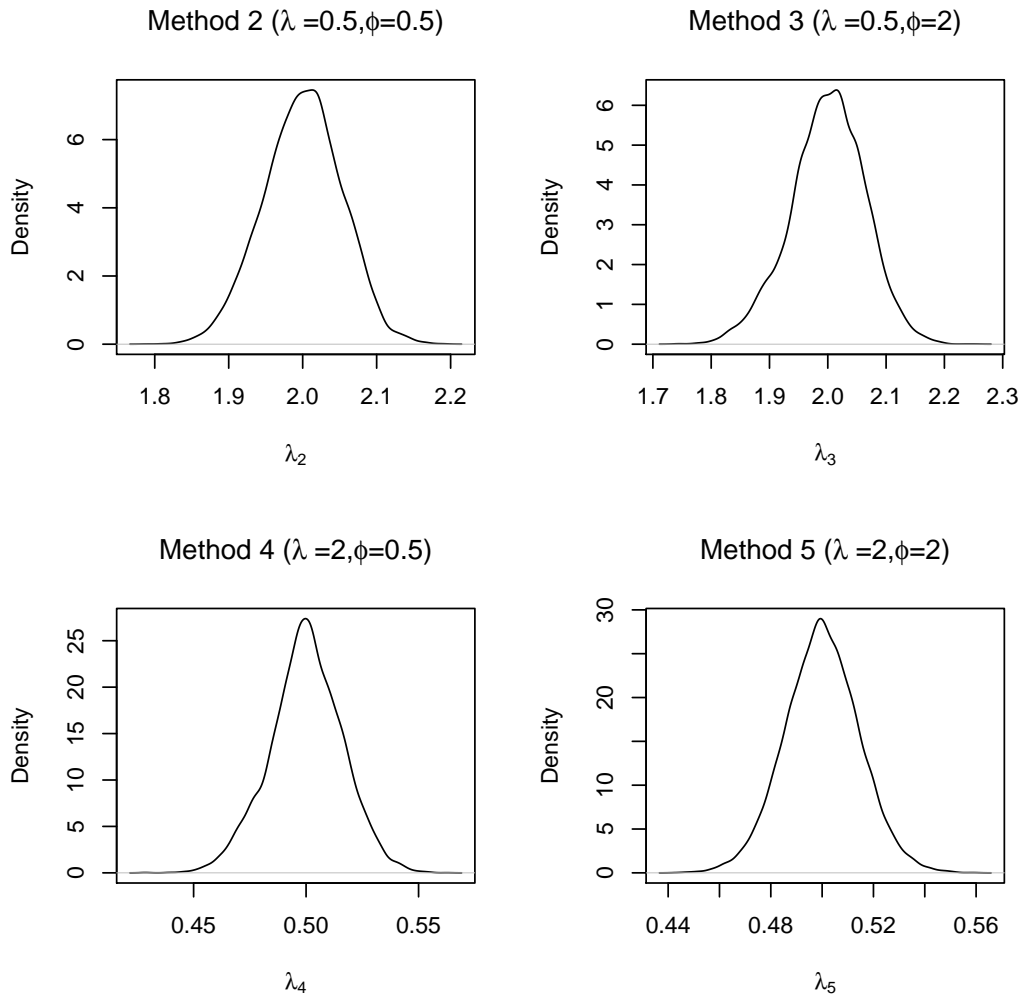

Figure 7: Density plots for  $\lambda_j$  ( $j = 1, \dots, 5$ ). The Figure shows how in the simulation study the posterior  $\lambda_j$  distribution for each method is centered around the *true* value suggesting a good performance of the model in estimating the true error terms

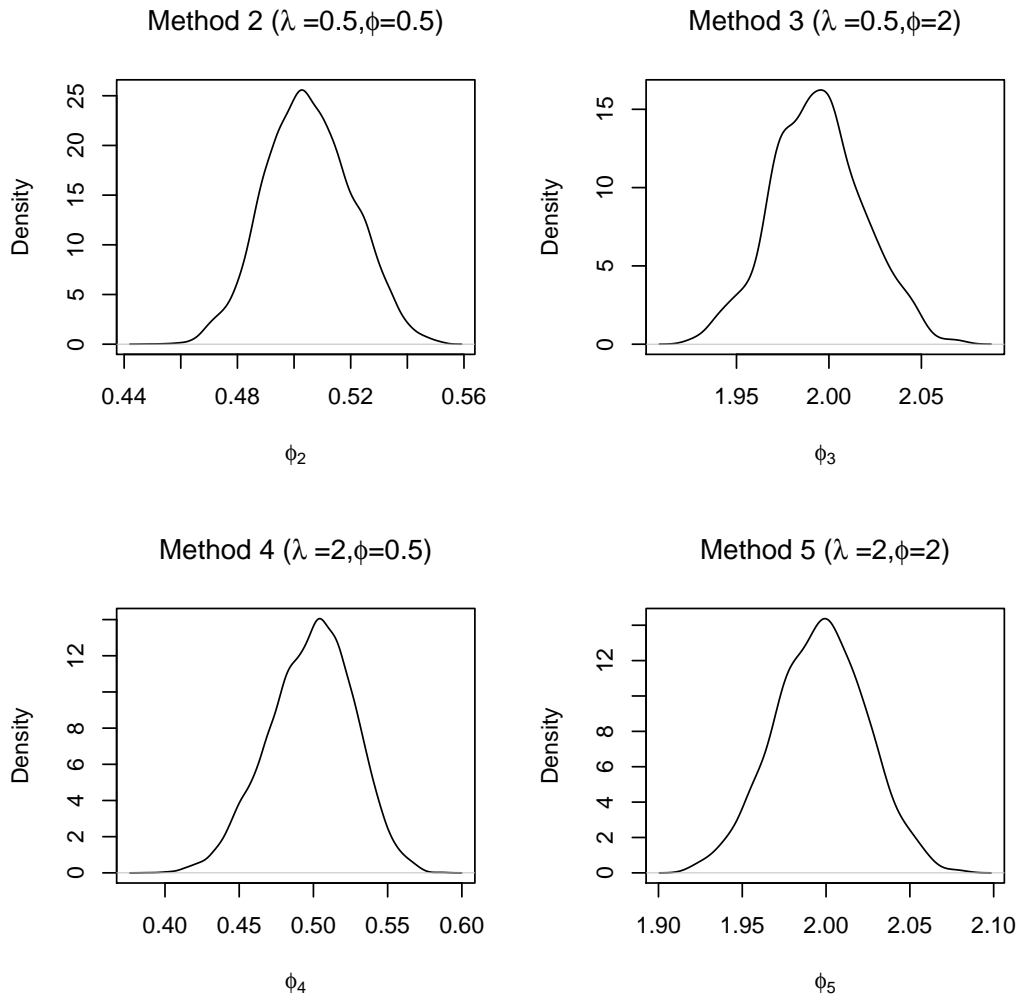

Figure 8: Density plots for  $\phi_j$  ( $j = 1, \dots, 5$ ). The Figure shows how in the simulation study the posterior  $\phi_j$  distribution for each method is centered around the *true* value suggesting a good performance of the model in estimating the true relative bias parameters

### 3 WinBUGS code

```
#Calibration model with the corner point constraint
#G=genes
#J=pre-processing
#K=replicates

model{

  for(g in 1:G){
    for(j in 1:J){
      for(k in 1:K){
        # log gene expression
        y1[g,j,k] ~ dnorm(mu[g,j,1],tau1[g,j])
        y2[g,j,k] ~ dnorm(mu[g,j,2],tau2[g,j])
        #Predicted values under the model
        y1new[g,j,k] ~ dnorm(mu[g,j,1],tau.new1[g,j])
        y2new[g,j,k] ~ dnorm(mu[g,j,2],tau.new2[g,j])

      }
      #ANOVA
      #Condition 1
      mu[g,j,1] <- alpha[g,j] - 1/2*delta[g]*exp(d[j])
      #Condition 2
      mu[g,j,2] <- alpha[g,j] + 1/2*delta[g]*exp(d[j])

      #VARIANCE gene, method and condition specific
      tau1[g,j] <-exp(lambda1[1,j] + lambda1[2,j]*expr[g] + lambda1[3,j]*pow(expr[g],2))
      *tau.gene1[g]
      tau2[g,j] <-exp(lambda2[1,j] + lambda2[2,j]*expr[g] + lambda2[3,j]*pow(expr[g],2))
      *tau.gene2[g]
      tau.new1[g,j] <-exp(lambda1[1,j] + lambda1[2,j]*expr[g] + lambda1[3,j]*pow(expr[g],2))
      *tau.gene.new1[g]
      tau.new2[g,j] <-exp(lambda2[1,j] + lambda2[2,j]*expr[g] + lambda2[3,j]*pow(expr[g],2))
      *tau.gene.new2[g]

      #Global gene expression for each gene and method
      alpha[g,j] ~ dnorm(0,0.00001)
    }

    #Differential expression for each gene
```

```

delta[g] ~ dnorm(0,0.0001)

#Precisions and Variances for each gene and condition
tau.gene1[g] ~ dgamma(a1,b1)
sigma.gene1[g] <- 1/tau.gene1[g]

tau.gene2[g] ~ dgamma(a2,b2)
sigma.gene2[g] <- 1/tau.gene2[g]

tau.gene.new1[g] ~ dgamma(a1,b1)
sigma.gene.new1[g] <- 1/tau.gene.new1[g]

tau.gene.new2[g] ~ dgamma(a2,b2)
sigma.gene.new2[g] <- 1/tau.gene.new2[g]
}

#Corner point constraint for the coefficients of the exponential
component of variability

for(r in 1:R){
lambda1[r,1]<-0
lambda2[r,1]<-0
for(j in 2:J){
lambda1[r,j] ~dnorm(0.01,0.01)
lambda2[r,j] ~dnorm(0.01,0.01)
}
}

#Corner point constraint for the relative bias coefficients

d[1]<-0
for(j in 2:J){
d[j] ~ dnorm(0.01,0.01)
}

#Hyperparameters for the variance

a1~dgamma(0.01,0.01)
b1~dgamma(0.01,bstar1)

a2~dgamma(0.01,0.01)

```

```

b2~dgamma(0.01,bstar2)

bstar1 <- 1/pow(bdistr1,2)
bstar2 <- 1/pow(bdistr2,2)

bdistr1 ~ dunif(0,13.36)
bdistr2 ~ dunif(0,13.80)
}

```

#### 4 Transforming corner point coefficients in sum to 0 coefficients

There are two types of constraints that can be used in the model: (i) corner point, (ii) sum to 0. Both constraints return the same results in terms of differential expression. We have applied the corner point that runs faster and then we have obtained the sum to 0 coefficients that are more easily interpretable. In this paragraph we provide the formula for extracting the “sum to 0” coefficients from the corner point ones. For  $j = 1, \dots, J$  methods we can specify the corner point constraint as follows:

$$\xi_j = \xi_1 + \beta_j \quad (j = 2, \dots, J \quad \xi_1 = 0) \quad (1)$$

Starting from these coefficients we want to apply a transformation to obtain the coefficients that satisfy the sum to 0 constraints:

$$\xi_j = \mu + \alpha_j \quad \left(\sum_j \alpha_j = 0\right) \quad (2)$$

Equalizing equation 1 and 2 when  $j = 1$  we obtain:

$$\alpha_1 = -\mu$$

Equalizing equation 1 and 2 when  $j > 1$  we obtain:

$$\alpha_j = \alpha_1 + \beta_j$$

Finally  $\mu$  can be obtained equalizing  $\sum_j \xi_j$  for the two constraints:

$$\begin{aligned} \sum_j \xi_j &= J\mu && \text{From equation 1} \\ \sum_j \xi_j &= \sum_j \beta_j && \text{From equation 2} \\ \mu &= \frac{\sum_j \beta_j}{J} \end{aligned}$$
